# Supplementary material for: Effects of C/N in the substrate on the simultaneous production of polyhydroxyalkanoates and extracellular polymeric substances by Haloferax mediterranei via kinetic model analysis
Source: Royal Society of Chemistry journal article supplement (doi:10.1039/c7ra02131c), 2017-01-01
Supplement: c7ra02131c1.pdf [file c7ra02131c1.pdf]

| C/N=65  |           |           |           |           |           |           |          |           |
|---------|-----------|-----------|-----------|-----------|-----------|-----------|----------|-----------|
| Time(h) | COD(mg/L) | Error bar | CDW(mg/L) | Error bar | EPS(mg/L) | Error bar | PHA(g/L) | Error bar |
| 12      | 9556.5    | 106.77312 | 10        | 14.14214  | 22.11626  | 0.35375   | 0.000419 | 0.000220  |
| 24      | 9255.5    | 318.90516 | 500       | 154.55844 | 40.29394  | 0.35375   | 0.07242  | 0.01341   |
| 28      | 9117      | 302.6417  | 960       | 195.9798  | 74.91044  | 1.76876   | 0.12142  | 0.0343    |
| 32      | 9054.5    | 177.4838  | 1070      | 98.99495  | 85.87484  | 3.18376   | 0.19225  | 0.02231   |
| 36      | 9056      | 33.94113  | 1230      | 98.99495  | 105.40187 | 8.49003   | 0.20123  | 0.02435   |
| 40      | 9031      | 130.12312 | 1430      | 127.27922 | 137.03195 | 0.35375   | 0.23414  | 0.03102   |
| 48      | 8854.5    | 249.60869 | 1350      | 56.56854  | 158.15955 | 9.55129   | 0.16264  | 0.0402    |
| 60      | 8930      | 142.83557 | 1370      | 28.28427  | 218.82473 | 26.53135  | 0.07412  | 0.02267   |
| 72      | 9280      | 141.42136 | 1360      | 226.27417 | 200.3948  | 9.55129   | 0.07281  | 0.01224   |

| C/N=35  |           |           |           |           |           |           |          |           |
|---------|-----------|-----------|-----------|-----------|-----------|-----------|----------|-----------|
| Time(h) | COD(mg/L) | Error bar | CDW(mg/L) | Error bar | EPS(mg/L) | Error bar | PHA(g/L) | Error bar |
| 12      | 9481.5    | 212.83914 | 50        | 17.71068  | 16.7095   | 0.35375   | 0.00202  | 0.000168  |
| 24      | 8142.5    | 235.46656 | 820       | 44.26407  | 38.9746   | 2.47626   | 0.14075  | 0.02096   |
| 28      | 7156      | 316.78384 | 1250      | 125.26912 | 69.76532  | 2.12251   | 0.17192  | 0.04237   |
| 32      | 6901      | 31.1127   | 1590      | 212.13203 | 100.46513 | 4.24502   | 0.34555  | 0.06418   |
| 36      | 6424.5    | 359.91735 | 1701      | 236.3961  | 140.52145 | 9.19754   | 0.25295  | 0.05      |
| 40      | 6299      | 394.56558 | 1980      | 137.40115 | 205.12282 | 21.13012  | 0.38019  | 0.01066   |
| 48      | 5444.5    | 325.97623 | 2010      | 155.56349 | 261.79078 | 27.04893  | 0.68509  | 0.04      |
| 60      | 5219      | 432.74935 | 2070      | 182.84271 | 296.56699 | 25.4701   | 0.91069  | 0.01301   |

|    |      |           |      |           |           |          |         |        |
|----|------|-----------|------|-----------|-----------|----------|---------|--------|
| 72 | 5891 | 182.43355 | 2060 | 240.41631 | 174.20914 | 22.28634 | 0.71057 | 0.0259 |
|----|------|-----------|------|-----------|-----------|----------|---------|--------|

| C/N=15□ |           |           |           |           |           |           |          |           |
|---------|-----------|-----------|-----------|-----------|-----------|-----------|----------|-----------|
| Time(h) | COD(mg/L) | Error bar | CDW(mg/L) | Error bar | EPS(mg/L) | Error bar | PHA(g/L) | Error bar |
| 12      | 9647.5    | 103.9447  | 410       | 14.14214  | 19.64655  | 0.7075    | 0.01402  | 0.00979   |
| 24      | 7988.5    | 160.51324 | 1200      | 113.13708 | 116.01157 | 2.12251   | 0.12262  | 0.31822   |
| 28      | 6716.5    | 260.9224  | 2210      | 42.42641  | 223.08009 | 11.32004  | 0.73177  | 0.27909   |
| 32      | 5186      | 217.78889 | 3700      | 56.56854  | 293.87932 | 16.72128  | 1.76088  | 0.38606   |
| 36      | 4161      | 367.69553 | 5410      | 763.67532 | 394.9039  | 12.83001  | 3.99776  | 0.33141   |
| 40      | 3899.5    | 48.79037  | 7230      | 565.68542 | 454.68969 | 13.18376  | 5.51863  | 0.56301   |
| 48      | 3778.5    | 122.32947 | 8000      | 240.41631 | 486.93135 | 10.96629  | 5.80494  | 0.57125   |
| 60      | 3711      | 127.27922 | 8240      | 777.81746 | 547.79039 | 11.41501  | 6.70647  | 0.6187    |
| 72      | 3766      | 206.47518 | 8230      | 339.41125 | 354.17471 | 6.72128   | 4.575    | 0.51297   |

| C/N=5   |           |           |           |           |           |           |          |           |
|---------|-----------|-----------|-----------|-----------|-----------|-----------|----------|-----------|
| Time(h) | COD(mg/L) | Error bar | CDW(mg/L) | Error bar | EPS(mg/L) | Error bar | PHA(g/L) | Error bar |
| 12      | 9871      | 147.07821 | 310       | 42.42641  | 16.74551  | 4.17073   | 0.02877  | 0.00631   |
| 24      | 7975      | 141.42136 | 1540      | 325.26912 | 154.05062 | 4.44878   | 1.44209  | 0.01634   |
| 28      | 7361      | 240.41631 | 2490      | 113.13708 | 233.68158 | 4.72682   | 1.94035  | 0.01372   |
| 32      | 6267.5    | 215.66757 | 7150      | 70.71068  | 289.3516  | 21.13169  | 2.61899  | 0.1528    |
| 36      | 4602.5    | 307.59145 | 10200     | 1747.6659 | 420.58852 | 27.5268   | 3.65376  | 0.19795   |
| 40      | 3177.5    | 174.65537 | 14190     | 457.78787 | 550.44111 | 13.90243  | 4.4518   | 0.06705   |
| 48      | 1655.5    | 212.83914 | 15100     | 140.41631 | 646.22465 | 23.07803  | 6.88218  | 1.02614   |

|    |       |           |       |           |           |          |         |         |
|----|-------|-----------|-------|-----------|-----------|----------|---------|---------|
| 60 | 752.5 | 212.83914 | 15570 | 771.85858 | 698.07275 | 21.96583 | 7.83364 | 1.00841 |
| 72 | 451.5 | 100.2134  | 15800 | 1390.0209 | 733.57667 | 22.79998 | 8.89861 | 1.01013 |
